# Supplementary material for: A durable anion conducting membrane with packed anion-exchange sites and an aromatic backbone for solid-state alkaline fuel cells
Source: Royal Society of Chemistry journal article supplement (doi:10.1039/c5py01058f), 2015-01-01
Supplement: c5py01058f1.pdf [file c5py01058f1.pdf]

Electronic Supplementary Information

a

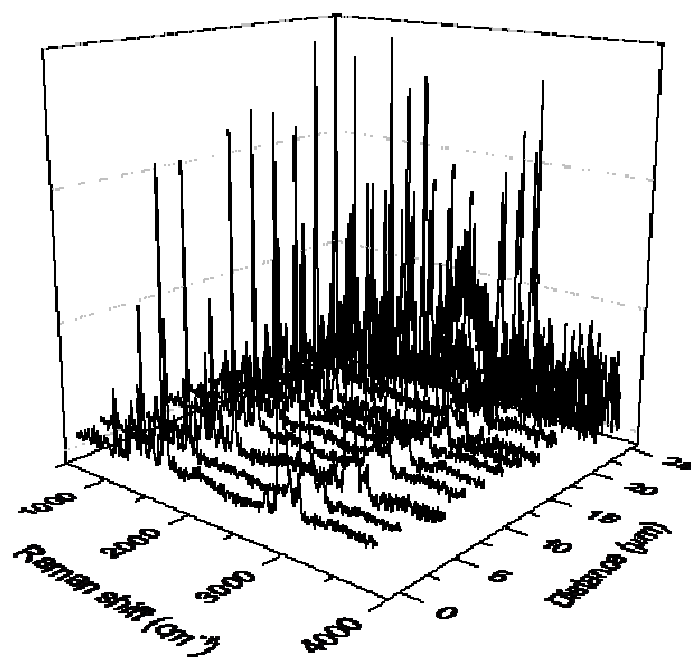

b

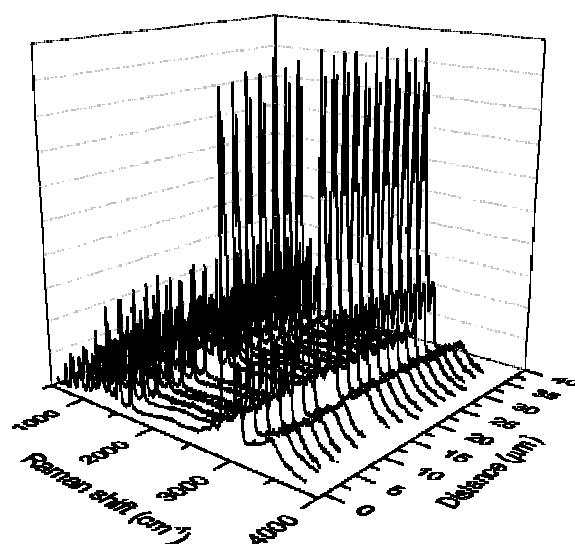

**Figure S1.** Confocal-Raman spectra along the cross-section of (A) **PTDAMPB** and (b) **PVBTAC** pore-filling membranes in the region of 500 cm<sup>-1</sup> to 3500 cm<sup>-1</sup> confirming pore-filling by the polyelectrolytes.
